# Supplementary material for: FOXQ1 inhibits the progression of osteoarthritis by regulating pyroptosis
Source: publisher site journal article supplement (doi:10.18632/aging.205600), 2024-03-19
Supplement: Supplementary file [file aging-v16i6-205600-supplementary-material-SD1.pdf]

## SUPPLEMENTARY TABLES

**Supplementary Table 1. The sequences of primers and siRNAs for QRT-PCR validation.**

| Name       | Sequence (5'-3')      |
|------------|-----------------------|
| GAPDH-F    | GAGAGTGTTTCCTCGTCCCG  |
| GAPDH-R    | ACTGTGCCGTTGAATTTGCC  |
| ADRB3-F    | AAACGGCTCTCTGGCTTTGT  |
| ADRB3-R    | ATTACCAGCAGGTTGCCTCC  |
| ADIG-F     | GTGAGCGACCTCACACTCTC  |
| ADIG -R    | CACAGCCACACTCAGATGGT  |
| MEGF6-F    | GCATTGACATCGACGACTGC  |
| MEGF6-R    | AGCCGTCTGTGTTGAGTCTG  |
| C1QTNF3-F  | TGGCCAAAGGAGATGAAGTCT |
| C1QTNF3-R  | GAAAGCCTGCGAAGGTGGAG  |
| ISOC2B-F   | TCCCAGAGTCCTCCATCCTG  |
| ISOC2B -R  | TGGACAGAAAGACGCCACTC  |
| HEATR4-F   | TAGGGTCCAGGCCATCATCA  |
| HEATR4-R   | CCGTCCTGGGAATTCCTT    |
| FOXQ1-F    | ACTGATGACAGCAGAACGCA  |
| FOXQ1-R    | AGGTGTATTCGCTGTTGGGG  |
| MISP-F     | TCGCTGAGCTCAAAGCAAGA  |
| MISP-R     | CTGGGACCTTGAATCGCAGT  |
| Si-FOXQ1-1 | CGCGGACTTTGCACTTTGA   |
| Si-FOXQ1-2 | AGGGAACCTTTCCACACTA   |
| Si-FOXQ1-3 | CCATCAAACGTGCCTTAAA   |
| Si-NC      | TTCTCCGAACGTGTCACGT   |

**Supplementary Table 2. Top 15 up and down-regulated differential expressed genes.**

| <b>Genes</b>  | <b>Description</b>                                                         | <b>log2fc</b> | <b>pval</b> | <b>padj</b> | <b>Up/down</b> |
|---------------|----------------------------------------------------------------------------|---------------|-------------|-------------|----------------|
| Adrb3         | adrenergic receptor, beta 3                                                | 5.234         | 0.006       | 0.154       | Up             |
| Xlr3b         | X-linked lymphocyte-regulated 3B                                           | 4.359         | 0.000       | 0.034       | Up             |
| Mrgprb2       | MAS-related GPR, member B2                                                 | 3.911         | 0.035       | 0.394       | Up             |
| 1700001O22Rik | RIKEN cDNA 1700001O22 gene                                                 | 3.902         | 0.049       | 0.462       | Up             |
| Slc7a10       | solute carrier family 7                                                    | 3.666         | 0.005       | 0.139       | Up             |
| Tmem139       | transmembrane protein 139                                                  | 3.444         | 0.021       | 0.310       | Up             |
| Serpinc1      | serine (or cysteine) peptidase inhibitor, clade C (antithrombin), member 1 | 3.343         | 0.026       | 0.342       | Up             |
| Moxd1         | monooxygenase, DBH-like 1                                                  | 3.317         | 0.007       | 0.182       | Up             |
| Adig          | adipogenin                                                                 | 3.158         | 0.004       | 0.130       | Up             |
| Pou2f3        | POU domain, class 2, transcription factor 3                                | 3.129         | 0.044       | 0.441       | Up             |
| Cfd           | complement factor D (adipsin)                                              | 3.098         | 0.003       | 0.110       | Up             |
| Megf6         | multiple EGF-like-domains 6                                                | 2.854         | 0.026       | 0.344       | Up             |
| C1qtnf3       | C1q and tumor necrosis factor related protein 3                            | 2.819         | 0.006       | 0.161       | Up             |
| Lgals12       | lectin, galactose binding, soluble 12                                      | 2.789         | 0.038       | 0.409       | Up             |
| Cidec         | cell death-inducing DFFA-like effector c                                   | 2.784         | 0.012       | 0.228       | Up             |
| 2010109A12Rik | RIKEN cDNA 2010109A12 gene                                                 | -3.042        | 0.019       | 0.294       | Down           |
| Isoc2b        | isochorismatase domain containing 2b                                       | -2.754        | 0.000       | 0.026       | Down           |
| Tdrd5         | tudor domain containing 5                                                  | -2.537        | 0.005       | 0.147       | Down           |
| Heatr4        | HEAT repeat containing 4                                                   | -2.461        | 0.050       | 0.465       | Down           |
| Foxq1         | forkhead box Q1                                                            | -2.225        | 0.027       | 0.351       | Down           |
| Gvin1         | GTPase, very large interferon inducible 1                                  | -2.197        | 0.005       | 0.145       | Down           |
| Misp          | mitotic spindle positioning                                                | -2.138        | 0.026       | 0.347       | Down           |
| Gm8909        | predicted gene 8909                                                        | -2.136        | 0.026       | 0.347       | Down           |
| Gipr          | gastric inhibitory polypeptide receptor                                    | -2.064        | 0.045       | 0.448       | Down           |
| Gm4841        | predicted gene 4841                                                        | -2.045        | 0.032       | 0.380       | Down           |
| Slc4a5        | solute carrier family 4, sodium bicarbonate cotransporter, member 5        | -2.038        | 0.040       | 0.420       | Down           |
| Olf433        | olfactory receptor 433                                                     | -1.934        | 0.012       | 0.230       | Down           |
| Cdcp3         | CUB domain containing protein 3                                            | -1.903        | 0.027       | 0.353       | Down           |
| H2-Q7         | histocompatibility 2, Q region locus 7                                     | -1.888        | 0.002       | 0.095       | Down           |
| Kcnip2        | Kv channel-interacting protein 2                                           | -1.873        | 0.045       | 0.448       | Down           |
